# Supplementary material for: Hydrogen bonding-based strongly adhesive coacervate hydrogels synthesized using poly(N-vinylpyrrolidone) and tannic acid
Source: Royal Society of Chemistry journal article supplement (doi:10.1039/c8sm02144a), 2019-01-01
Supplement: c8sm02144a1.pdf [file c8sm02144a1.pdf]

Supporting Information

**Hydrogen Bonding-based Strongly Adhesive  
Coacervate Hydrogels Synthesized Using Poly(N-  
vinylpyrrolidone) and Tannic Acid**

*Hyeon Gyun Nam<sup>#a</sup>, Myeong Gyun Nam<sup>#a</sup>, Pil J. Yoo<sup>\*a,b</sup>, and Ji-Heung Kim<sup>\*a</sup>*

<sup>a</sup> School of Chemical Engineering and <sup>b</sup> SKKU Advanced Institute of Nanotechnology (SAINT),  
Sungkyunkwan University (SKKU), Suwon 16419, Republic of Korea

<sup>#</sup> Both authors contributed equally to this work.

\* E-mail: pjyoo@skku.edu, kimjh@skku.edu

## Supporting figures

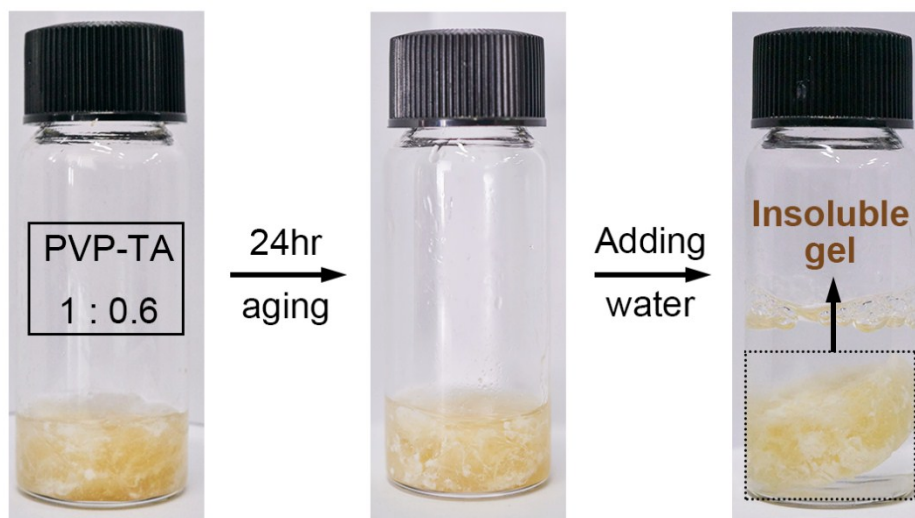

**Figure S1.** Images for redissolution testing of 24 h-aged h-PVP-TA coacervate hydrogel in water.

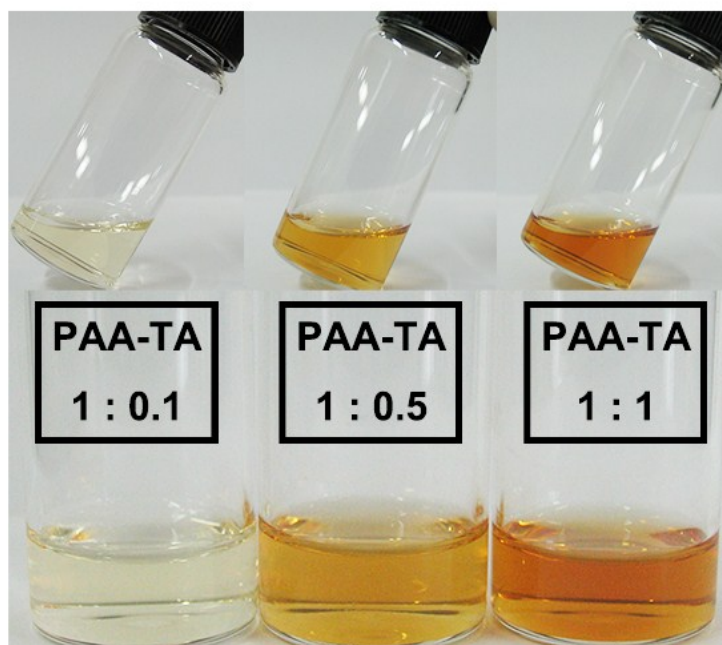

**Figure S2.** Images of the complexed sol of PAA-TA according to the concentration variations of TA.

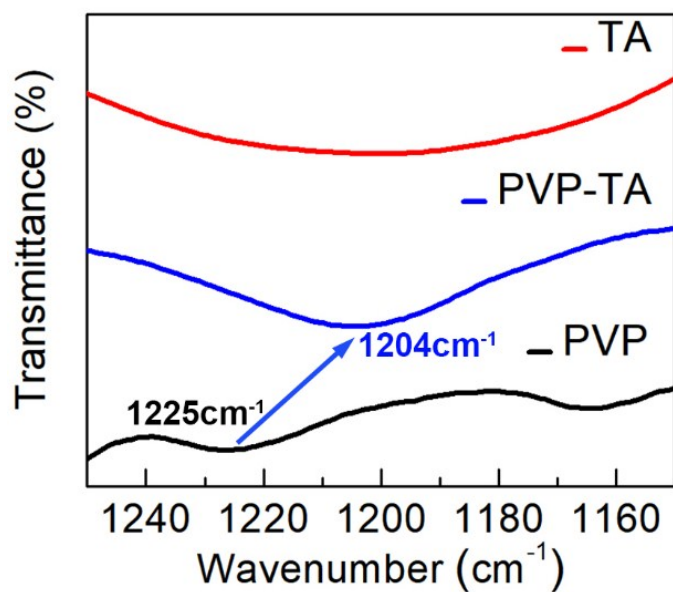

**Figure S3.** Magnified FTIR data of TA, PVP, and PVP-TA cocervate hydrogel (wavenumber range of 1,150 ~ 1,250  $\text{cm}^{-1}$ ).

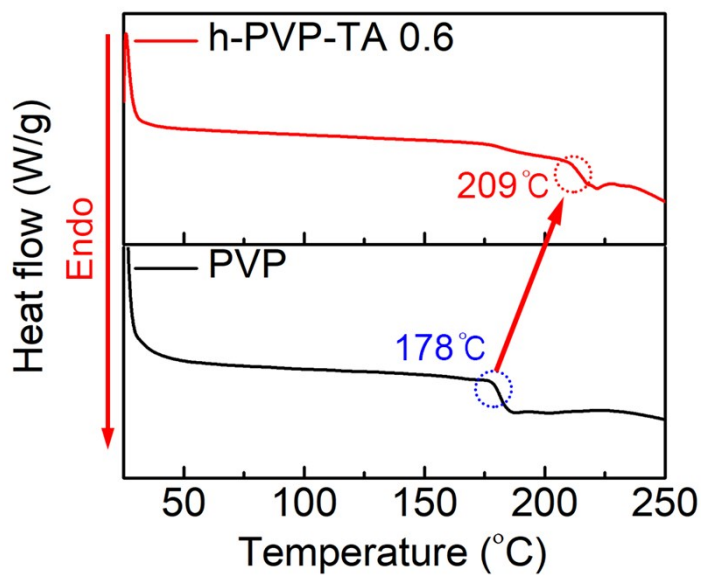

**Figure S4.** DSC plots for pure PVP and h-PVP-TA complexes.

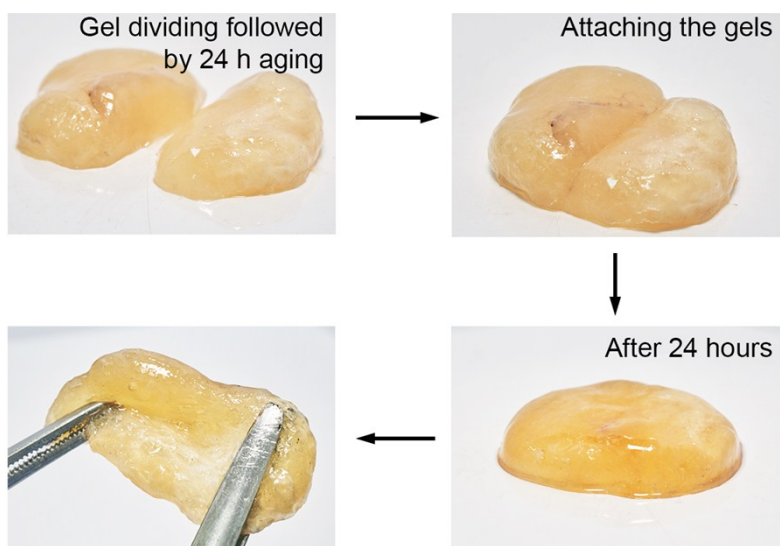

**Figure S5.** Stepwise photographs of showing self-healing process of h-PVP-TA coacervate hydrogel after 24 h resting.

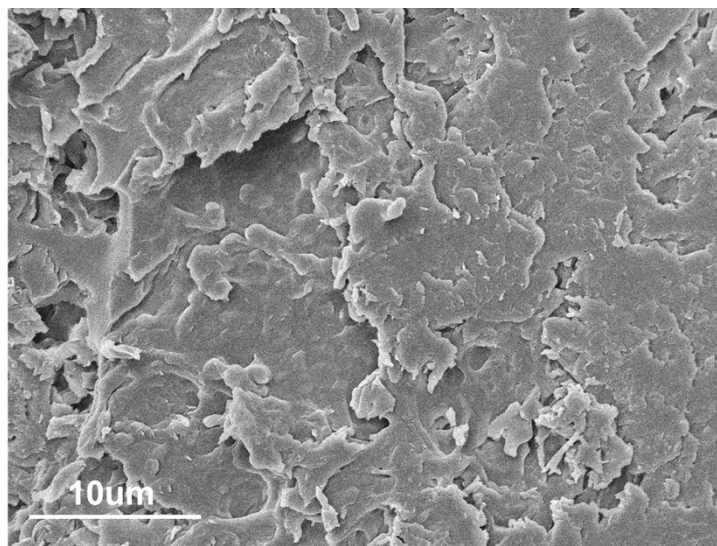

**Figure S6.** SEM image of freeze-dried l-PVP-TA coacervate.

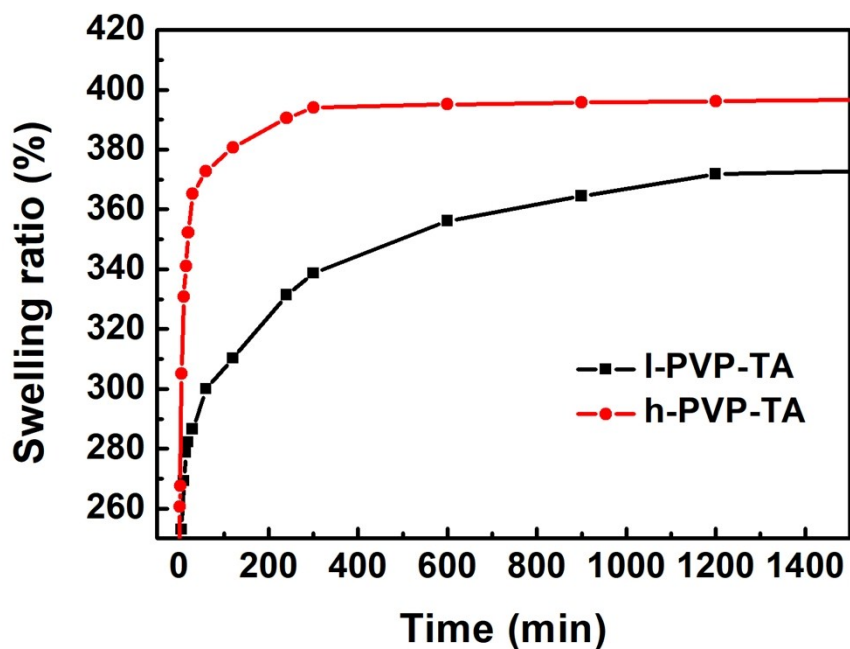

Figure S7. Comparison of swelling ratio between l-PVP-TA and h-PVP-TA hydrogels.

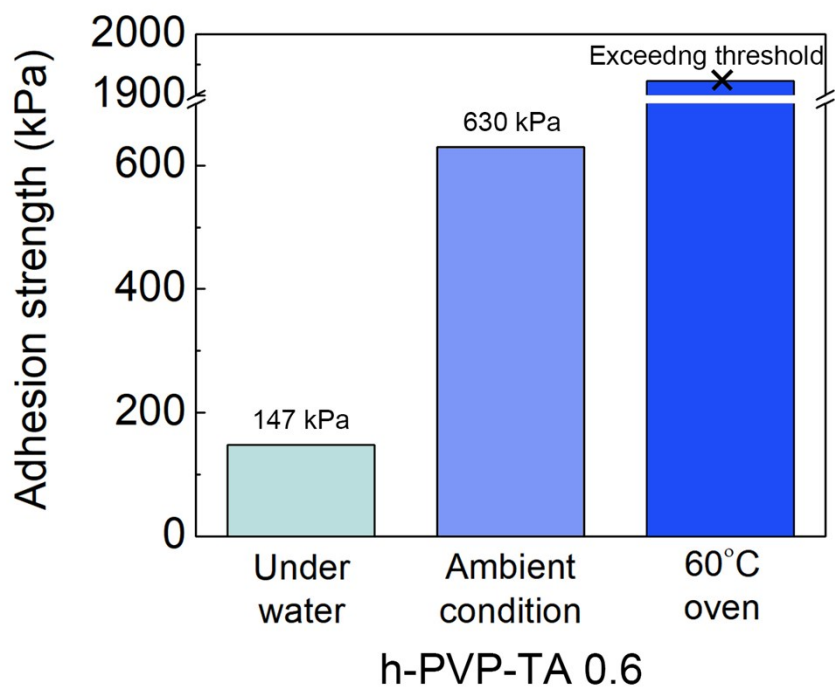

Figure S8. Measurements of adhesion strength of h-PVP-TA on glass substrates with 2 h aging under various conditions.

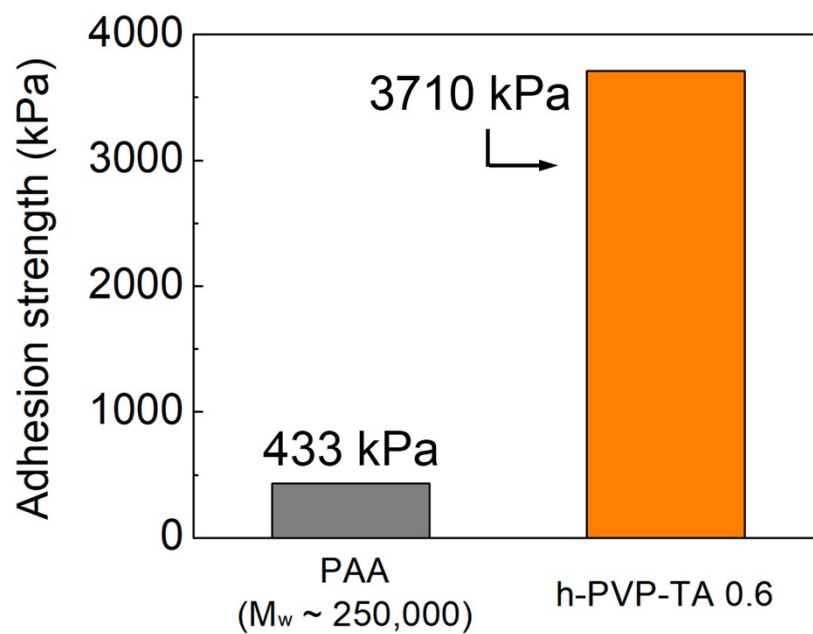

**Figure S9.** Measurements of adhesion strength of PAA and h-PVP-TA binders with 12 h aging on glass substrates.

| Adhesives                                | Adhesion test    | Adherend             | Sample preparation condition    | Adhesive strength | References                         |
|------------------------------------------|------------------|----------------------|---------------------------------|-------------------|------------------------------------|
| Deacetylated chitosan, dopamine          | lap shear        | glass                | Room temperature (RT), 24 h     | 0.4 MPa           | Yamada <i>et al.</i> <sup>1</sup>  |
| CPD-5                                    | lap shear        | Gelatin coated glass | 37°C, 24 h                      | ~1 MPa            | Zeng <i>et al.</i> <sup>2</sup>    |
| PVP-catechol                             | lap shear        | glass                | RT, 24 h                        | 1.1 MPa           | Mu <i>et al.</i> <sup>3</sup>      |
| CHT/HA-DN                                | lap shear        | glass                | 40°C, overnight                 | 2.34 MPa          | Neto <i>et al.</i> <sup>4</sup>    |
| P(10H-1C-1A)                             | lap shear        | glass                | RT, 24 h                        | 0.34 MPa          | Nishida <i>et al.</i> <sup>5</sup> |
| p(SCD)                                   | lap shear        | glass                | RT, 30 min after UV irradiation | 0.87 MPa          | Xu <i>et al.</i> <sup>6</sup>      |
| EGAMA-DOPA                               | lap shear        | glass                | RT, 24 h                        | 0.32 MPa          | Xue <i>et al.</i> <sup>7</sup>     |
| [CHT/HA-C/CHT/BG] <sub>5</sub> -CHT/HA-C | lap shear        | glass                | 37°C, overnight                 | 2.09 MPa          | Rego <i>et al.</i> <sup>8</sup>    |
| ACC/PAA hydrogel                         | lap shear        | glass                | 30°C, 24 h                      | ~1 MPa            | Li <i>et al.</i> <sup>9</sup>      |
| <b>PVP-TA coacervate hydrogel</b>        | <b>lap shear</b> | <b>glass</b>         | <b>RT, 12 h</b>                 | <b>~3.71 MPa</b>  | <b>This work</b>                   |

**Table S1.** List of adhesive performances of biocompatible polymer-based adhesives.

## References

1. K. Yamada, T. Chen, G. Kumar, O. Vesnovsky, L. T. Topoleski and G. F. Payne, *Biomacromolecules*, 2000, **1**, 252-258.
2. Z. Zeng, H. Wang, Y. Morsi and X. Mo, *Colloids Surf. B. Biointerfaces*, 2018, **161**, 94-102.
3. Y. Mu, X. Wu, D. Pei, Z. Wu, C. Zhang, D. Zhou and X. Wan, *ACS Biomater. Sci. Eng.*, 2017, **3**, 3133-3140.
4. A. I. Neto, A. C. Cibrão, C. R. Correia, R. R. Carvalho, G. M. Luz, G. G. Ferrer, G. Botelho, C. Picart, N. M. Alves and J. F. Mano, *Small*, 2014, **10**, 2459-2469.
5. J. Nishida, M. Kobayashi and A. Takahara, *J. Polym. Sci. A, Polym. Chem.*, 2013, **51**, 1058-1065.
6. Y. Xu, Q. Liu, A. Narayanan, D. Jain, A. Dhinojwala and A. Joy, *Adv. Mater. Interf.*, 2017, **4**, 1700506.
7. J. Xue, T. Wang, J. Nie and D. Yang, *J. Photochem. Photobiol. B, Biol.*, 2013, **119**, 31-36.
8. S. J. Rego, A. C. Vale, G. M. Luz, J. F. Mano and N. M. Alves, *Langmuir*, 2016, **32**, 560-568.
9. A. Li, Y. Jia, S. Sun, Y. Xu, B. B. Minsky, M. A. C. Stuart, H. Cölfen, R. von Klitzing and X. Guo, *ACS Appl. Mater. Interfaces*, 2018, **10**, 10471-10479.
